# Supplementary material for: Photophysical, dynamic and redox behavior of tris(2,6-diisopropylphenyl)phosphine
Source: Royal Society of Chemistry journal article supplement (doi:10.1039/b709602j), 2008-01-01
Supplement: b709602j.pdf [file b709602j.pdf]

# Photophysical, Dynamic and Redox Behavior of *tris*-(2,6-Diisopropylphenyl)phosphine

*René T. Boéré,<sup>1\*</sup> Alan M. Bond,<sup>2</sup> Steve Cronin,<sup>1</sup> Noel W. Duffy,<sup>2</sup> Paul Hazendonk,<sup>1</sup> Jason D.*

*Masuda,<sup>1</sup> Kyle Pollard,<sup>1</sup> Tracey L. Roemmele,<sup>1</sup> Peter Tran,<sup>1</sup> Yuankui Zhang,<sup>1</sup>*

Department of Chemistry and Biochemistry, The University of Lethbridge, Lethbridge, AB Canada

T1K 3M4 and the School of Chemistry, Monash University, Clayton, Victoria 3800, Australia

## Electronic Supplementary Information

<sup>1</sup> University of Lethbridge (boere@uleth.ca; +1-403-329-2045; Fax +1-403-329-2057)

boere@uleth.ca

<sup>2</sup> Monash University (Alan.Bond@sci.monash.edu.au; +61 3 9905 1338; Fax +61 3 9905 4597)

**Table S1.** Interatomic distances [Å] and angles [°] for Dipp<sub>3</sub>P and Dipp<sub>3</sub>P<sup>+</sup> from X-ray and Computation<sup>1</sup>

| Dimension                      | Experiment<br>C <sub>3</sub> Dipp <sub>3</sub> P | C <sub>3</sub> in<br>B3LYP/6-<br>31G(d) | D <sub>3</sub> in<br>B3LYP/6-<br>31G(d) | C <sub>3</sub> in<br>HF6/6-<br>31G(d) | [Dipp <sub>3</sub> P] <sup>+</sup><br>in<br>UHF6/6-<br>31G(d) |
|--------------------------------|--------------------------------------------------|-----------------------------------------|-----------------------------------------|---------------------------------------|---------------------------------------------------------------|
| P-C1                           | 1.8507(16)                                       | 1.8781                                  | 1.8142                                  | 1.8777                                | 1.8353                                                        |
| C1-C6                          | 1.418(2)                                         | 1.4236                                  | 1.4272                                  | 1.4122                                | 1.4164                                                        |
| C1-C2                          | 1.425(2)                                         | 1.4310                                  |                                         | 1.4221                                | 1.4187                                                        |
| C2-C3                          | 1.388(3)                                         | 1.3988                                  | 1.3980                                  | 1.3877                                | 1.3964                                                        |
| C2-C7                          | 1.517(3)                                         | 1.5348                                  | 1.5236                                  | 1.5354                                | 1.5301                                                        |
| C3-C4                          | 1.395(3)                                         | 1.3901                                  | 1.3945                                  | 1.3793                                | 1.3843                                                        |
| C4-C5                          | 1.368(4)                                         | 1.3869                                  |                                         | 1.3748                                | 1.3852                                                        |
| C5-C6                          | 1.403(3)                                         | 1.4034                                  |                                         | 1.3936                                | 1.3962                                                        |
| C6-C10                         | 1.514(3)                                         | 1.5291                                  |                                         | 1.5288                                | 1.5273                                                        |
| C7-C9                          | 1.531(3)                                         | 1.5412                                  | 1.5362                                  | 1.5354                                | 1.5373                                                        |
| C7-C8                          | 1.531(3)                                         | 1.5410                                  | 1.5451                                  | 1.5373                                | 1.5362                                                        |
| C10-C12                        | 1.529(3)                                         | 1.5405                                  |                                         | 1.5352                                | 1.5365                                                        |
| C10-C11                        | 1.531(3)                                         | 1.5441                                  |                                         | 1.5396                                | 1.5378                                                        |
| P oop of C1 × 3 <sup>2</sup>   | 0.539                                            | 0.536                                   | 0                                       | 0.531                                 | 0.193                                                         |
| P oop C2-C3-C5-C6 <sup>3</sup> | 0.430                                            | 0.434                                   | 0                                       | 0.424                                 | 0.060                                                         |
| <hr/>                          |                                                  |                                         |                                         |                                       |                                                               |
| C1#1-P-C1                      | 111.88(5)                                        | 112.2                                   | 120.0                                   | 112.3                                 | 118.9                                                         |
| C6-C1-C2                       | 118.90(16)                                       | 118.8                                   | 121.4                                   | 118.5                                 | 121.3                                                         |
| C6-C1-P                        | 127.17(13)                                       | 126.8                                   |                                         | 127.2                                 | 122.5                                                         |
| C2-C1-P                        | 113.10(12)                                       | 113.4                                   | 119.29                                  | 113.4                                 | 116.2                                                         |
| C3-C2-C1                       | 119.67(17)                                       | 119.5                                   | 117.8                                   | 119.6                                 | 117.9                                                         |
| C3-C2-C7                       | 117.58(17)                                       | 116.8                                   | 124.5                                   | 116.3                                 | 117.2                                                         |
| C1-C2-C7                       | 122.75(15)                                       | 123.7                                   | 121.4                                   | 124.1                                 | 124.9                                                         |
| C2-C3-C4                       | 121.0(2)                                         | 121.5                                   | 120.1                                   | 121.5                                 | 121.4                                                         |
| C5-C4-C3                       | 119.51(19)                                       | 119.1                                   |                                         | 119.2                                 | 120.0                                                         |
| C4-C5-C6                       | 122.0(2)                                         | 121.9                                   |                                         | 121.8                                 | 121.6                                                         |
| C5-C6-C1                       | 118.8(2)                                         | 119.1                                   |                                         | 119.3                                 | 117.7                                                         |
| C5-C6-C10                      | 117.42(19)                                       | 116.2                                   |                                         | 115.7                                 | 117.4                                                         |
| C1-C6-C10                      | 123.75(17)                                       | 124.7                                   |                                         | 124.9                                 | 124.8                                                         |
| C2-C7-C9                       | 110.48(18)                                       | 110.8                                   | 112.6                                   | 111.0                                 | 112.0                                                         |
| C2-C7-C8                       | 111.87(19)                                       | 113.1                                   | 111.8                                   | 113.1                                 | 111.8                                                         |
| C9-C7-C8                       | 110.9(2)                                         | 110.5                                   | 110.8                                   | 110.3                                 | 110.7                                                         |
| C6-C10-C12                     | 112.4(2)                                         | 112.6                                   |                                         | 112.6                                 | 111.6                                                         |
| C6-C10-C11                     | 111.2(2)                                         | 111.6                                   |                                         | 111.7                                 | 112.3                                                         |
| C12-C10-C11                    | 109.9(2)                                         | 109.8                                   |                                         | 109.5                                 | 110.2                                                         |

<sup>1</sup> Symmetry transformation used to generate equivalent atoms: #1 -x+y-1,-x-1,z. Atom numbering scheme, see following page.<sup>2</sup> Plane of the three *isopropyl* C atoms of the aryl rings.<sup>3</sup> Plane of the four *ortho* and *meta* C atoms of the aryl ring.

**Table S2.** Table of electronic spectra of Dipp<sub>3</sub>P, Dipp<sub>3</sub>P<sup>++</sup> and Ph<sub>3</sub>P analogues<sup>a</sup>

| Compound                                                       | Conditions                                  | $\lambda_1$   | $\lambda_2$      | $\lambda_3$   | Luminescence | Stokes Shift<br>kJ/mol |
|----------------------------------------------------------------|---------------------------------------------|---------------|------------------|---------------|--------------|------------------------|
| Dipp <sub>3</sub> P                                            | hexanes                                     | 205<br>(11.4) | 254(8.7)         | 326(9.3)      | 503          | 129                    |
| Dipp <sub>3</sub> P                                            | ethanol <sup>b</sup>                        | 212           | 252              | 325           | 516          | 136                    |
| Dipp <sub>3</sub> P                                            | CH <sub>2</sub> Cl <sub>2</sub>             |               | 255(3.95)        | 327(4.01)     | —            | —                      |
| Ph <sub>3</sub> P                                              | cyclohexane                                 |               |                  | 260           | 445          | 201                    |
| Ph <sub>3</sub> P                                              | ethanol                                     |               |                  | 264           | 500          | 225                    |
|                                                                |                                             | $\lambda_1$   | $\lambda_2$      | $\lambda_3$   | $\lambda_4$  | $\lambda_5$            |
| Dipp <sub>3</sub> P <sup>++</sup> PF <sub>6</sub> <sup>-</sup> | CH <sub>2</sub> Cl <sub>2</sub>             | 251<br>(3.99) | 281 (3.89)<br>sh | 285 (3.91)    | 296 (3.78)   | 341 (3.49) sh          |
|                                                                |                                             | $\lambda_6$   | $\lambda_7$      | $\lambda_8$   | $\lambda_9$  |                        |
|                                                                |                                             | 357<br>(3.84) | 373 (4.04)       | 456 (3.29) sh | 498 (3.31)   |                        |
|                                                                |                                             | $\lambda_1$   |                  | $\lambda_2$   | $\lambda_3$  |                        |
| PPh <sub>3</sub> <sup>++</sup>                                 | flash<br>photolysis on<br>Vycor             | 330           |                  | 345           | 438          |                        |
| PPh <sub>3</sub> <sup>++</sup>                                 | 50:50<br>EtOH/H <sub>2</sub> O <sup>c</sup> | 330           |                  | 320           |              |                        |

<sup>a</sup> Data reported as  $\lambda_{\max}$  (nm) with log| $\epsilon$ | in brackets.<sup>b</sup> Saturated solution, log| $\epsilon$ | not determined.<sup>c</sup> Joschek H. I.; Grossweiner, L. I. *J. Am. Chem. Soc.* **1966**, 88, 3261-3268.

**Table S3.** Table of hfc constants for [Dipp<sub>3</sub>P]<sup>+</sup> from UB3LYP/6-31G(d) calculations.<sup>1</sup>

| Atom/Group         | Calc'd Spin Density | Calc'd B3LYP hfc (mT) <sup>2</sup> |
|--------------------|---------------------|------------------------------------|
| P                  | 0.844               | <b>19.2</b>                        |
| C1                 | -0.146              | -0.22                              |
| C2                 | 0.12                | 0.35                               |
| C3                 | -0.054              | -0.33                              |
| HC3                | 0.002               | <b>0.03</b>                        |
| C4                 | 0.112               | 0.14                               |
| HC4                | -0.005              | <b>-0.08</b>                       |
| C5                 | -0.043              | -0.03                              |
| HC5                | 0.005               | <b>0.29</b>                        |
| C6                 | 0.122               | 0.57                               |
| C7                 | 0.041               | 0.19                               |
| HC7                | -0.02               | <b>0.19</b>                        |
| C8                 | -0.003              | -0.01                              |
| H <sub>3</sub> C8  | 0.008               | <b>0.07</b>                        |
| C9                 | 0.007               | 0.09                               |
| H <sub>3</sub> C9  | 0.004               | <b>0.03</b>                        |
| C10                | 0.003               | 0.04                               |
| HC10               | -0.008              | <b>0.01</b>                        |
| C11                | 0.005               | 0.06                               |
| H <sub>3</sub> C11 | 0.001               | <b>0</b>                           |
| C12                | 0.001               | 0.01                               |
| H <sub>3</sub> C12 | 0.002               | <b>0.19</b>                        |

<sup>1</sup> Atom numbering scheme is that used in the crystallographic diagram, reproduced below (view is from above the C<sub>3</sub>P pyramid).

<sup>2</sup> Boldface numbers indicate isotopes with high abundance (<sup>1</sup>H and <sup>31</sup>P).

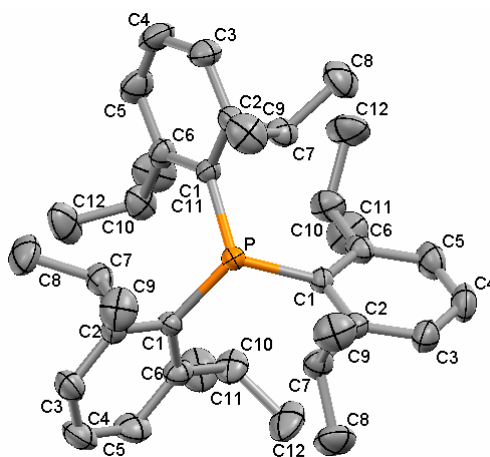

**Table S4.** Summary of Cyclic Voltammetry Data obtained for oxidation of Dipp<sub>3</sub>P

| Solvent          | [M]                    | Electrode   | $\nu / \text{mV s}^{-1}$ | $E_f^\circ / \text{V}^a$ | $\Delta E_p / \text{mV}$ | $I_p^{\text{ox}} / \mu\text{A}$ | $I_p^{\text{red}} / \mu\text{A}$ | $ I_p^{\text{red}}/I_p^{\text{ox}} $ |      |       |      |
|------------------|------------------------|-------------|--------------------------|--------------------------|--------------------------|---------------------------------|----------------------------------|--------------------------------------|------|-------|------|
| DCM <sup>b</sup> | 0.558                  | Pt (1.6 mm) | 50                       | 0.08                     | 100                      | 2.11                            | -2.12                            | 1.00                                 |      |       |      |
|                  |                        |             | 100                      | 0.09                     | 103                      | 2.78                            | -2.79                            | 1.00                                 |      |       |      |
|                  |                        |             | 400                      | 0.07                     | 158                      | 4.79                            | -4.99                            | 1.04                                 |      |       |      |
|                  |                        |             | 800                      | 0.08                     | 195                      | 6.25                            | -6.36                            | 1.02                                 |      |       |      |
|                  | 0.558                  | GC (3 mm)   | 50                       | 0.07                     | 102                      | 7.22                            | -7.04                            | 0.98                                 |      |       |      |
|                  |                        |             | 100                      | 0.07                     | 120                      | 9.90                            | -9.60                            | 0.97                                 |      |       |      |
|                  |                        |             | 200                      | 0.07                     | 144                      | 13.44                           | -12.60                           | 0.94                                 |      |       |      |
|                  |                        |             | 400                      | 0.08                     | 179                      | 16.78                           | -15.88                           | 0.95                                 |      |       |      |
|                  |                        |             | 800                      | 0.08                     | 219                      | 23.30                           | -21.60                           | 0.93                                 |      |       |      |
|                  |                        |             | ACN <sup>b</sup>         | 0.10                     | Pt (1.6 mm)              | 50                              | 0.17                             | 79                                   | 0.36 | -0.35 | 0.96 |
|                  |                        |             |                          |                          |                          | 100                             | 0.18                             | 87                                   | 0.49 | -0.49 | 1.00 |
|                  |                        |             |                          |                          |                          | 200                             | 0.18                             | 76                                   | 0.75 | -0.73 | 0.98 |
| 400              | 0.18                   | 73          |                          |                          |                          | 1.04                            | -0.90                            | 0.87                                 |      |       |      |
| 800              | 0.18                   | 86          |                          |                          |                          | 1.31                            | -1.24                            | 0.95                                 |      |       |      |
| 1200             | 0.18                   | 95          |                          |                          |                          | 1.47                            | -1.47                            | 1.00                                 |      |       |      |
| 4000             | 0.18                   | 138         |                          |                          |                          | 2.93                            | -2.89                            | 0.99                                 |      |       |      |
| 0.10             | GC (3 mm)              | 50          |                          | 0.17                     | 70                       | 1.28                            | -1.05                            | 0.82                                 |      |       |      |
|                  |                        | 100         |                          | 0.17                     | 68                       | 2.03                            | -1.65                            | 0.81                                 |      |       |      |
|                  |                        | 200         |                          | 0.16                     | 71                       | 2.54                            | -2.27                            | 0.89                                 |      |       |      |
|                  |                        | 400         |                          | 0.16                     | 74                       | 3.56                            | -2.98                            | 0.84                                 |      |       |      |
|                  |                        | 800         |                          | 0.16                     | 83                       | 4.96                            | -4.30                            | 0.87                                 |      |       |      |
| 0.10             | Pt (11 $\mu\text{m}$ ) | 20          | 0.16 <sup>c</sup>        | 71 <sup>d</sup>          | 0.26 <sup>e</sup>        |                                 |                                  |                                      |      |       |      |
|                  |                        | 50          | 0.17 <sup>c</sup>        | 74 <sup>d</sup>          | 0.25 <sup>e</sup>        |                                 |                                  |                                      |      |       |      |
|                  |                        | 100         | 0.17 <sup>c</sup>        | 85 <sup>d</sup>          | 0.27 <sup>e</sup>        |                                 |                                  |                                      |      |       |      |
|                  | GC (11 $\mu\text{m}$ ) | 50          | 0.22 <sup>c</sup>        | 116 <sup>d</sup>         | 0.21 <sup>e</sup>        |                                 |                                  |                                      |      |       |      |

<sup>a</sup>  $E_f^\circ$  (V vs Fc<sup>+</sup>/Fc couple),

<sup>b</sup> Containing 0.1 M <sup>n</sup>Bu<sub>4</sub>PF<sub>6</sub> at 295 K.

<sup>c</sup> Half-wave potentials

<sup>d</sup>  $|E_{3/4} - E_{1/4}|$

<sup>e</sup> limiting current at microelectrodes in nA.

**Table S5.** Diffusion Coefficient Values for Dipp<sub>3</sub>P obtained by different techniques

| RDE <sup>a</sup>                | Electrode  | D / 10 <sup>-5</sup> cm <sup>2</sup> s <sup>-1</sup> | RPM                   |
|---------------------------------|------------|------------------------------------------------------|-----------------------|
| CH <sub>3</sub> CN              | Pt         | 1.18                                                 | 1000                  |
| CH <sub>3</sub> CN              | Pt         | 1.16                                                 | 2000                  |
| CH <sub>3</sub> CN              | Pt         | 1.09                                                 | 3000                  |
| CH <sub>3</sub> CN              | GC         | 1.15                                                 | 2000                  |
| CH <sub>3</sub> CN              | GC         | 1.14                                                 | 3000                  |
| CH <sub>2</sub> Cl <sub>2</sub> | GC         | 1.03                                                 | 500                   |
| CH <sub>2</sub> Cl <sub>2</sub> | GC         | 1.05                                                 | 1000                  |
| CH <sub>2</sub> Cl <sub>2</sub> | GC         | 1.05                                                 | 2000                  |
| CH <sub>2</sub> Cl <sub>2</sub> | GC         | 1.04                                                 | 3000                  |
| CV <sup>b</sup>                 | Electrode  | D / 10 <sup>-5</sup> cm <sup>2</sup> s <sup>-1</sup> |                       |
| CH <sub>3</sub> CN              | Pt         | 0.82                                                 |                       |
| CH <sub>3</sub> CN              | GCE        | 0.87                                                 |                       |
| CH <sub>2</sub> Cl <sub>2</sub> | Pt         | 0.93                                                 |                       |
| CH <sub>2</sub> Cl <sub>2</sub> | GCE        | 1.19                                                 |                       |
| CH <sub>2</sub> Cl <sub>2</sub> | Au         | 0.98                                                 |                       |
| I <sub>ss</sub> <sup>c</sup>    | Electrode  | D / 10 <sup>-5</sup> cm <sup>2</sup> s <sup>-1</sup> | v/ mV s <sup>-1</sup> |
| CH <sub>3</sub> CN              | Pt (11 μm) | 1.22                                                 | 20                    |
|                                 |            | 1.18                                                 | 50                    |
| CH <sub>3</sub> CN              | GC(11 μm)  | 1.10                                                 | 50                    |

<sup>a</sup> RDE = rotating disk electrode 0.1 M <sup>n</sup>Bu<sub>4</sub>NPF<sub>6</sub> electrolyte present; D values calculated from Levich equation.<sup>41</sup>

<sup>b</sup> By fitting to the Randles-Sevcik equation 0.1 M <sup>n</sup>Bu<sub>4</sub>NPF<sub>6</sub> electrolyte present.<sup>41</sup>

<sup>c</sup> Using limiting current with microelectrodes of indicated diameter, 0.1 M <sup>n</sup>Bu<sub>4</sub>NPF<sub>6</sub> electrolyte present, assuming steady-state conditions and equations.

**Table S6.** Dependence of  $E_f$  for the  $[\text{Dipp}_3\text{P}]^{+}/0$  process in  $\text{CH}_2\text{Cl}_2$  on concentration and  ${}^n\text{Bu}_4\text{NPF}_6$  electrolyte concentration. <sup>a</sup>

| $[\text{Bu}_4\text{NPF}_6] / \text{M}$ | $R_{\text{mes}} / \text{ohm}$ | $[\text{Dipp}_3\text{P}] / \text{mM}$ | $E_f / \text{V}$ (vs. $\text{Fc}^+/\text{Fc}$ ) |
|----------------------------------------|-------------------------------|---------------------------------------|-------------------------------------------------|
| 0.511                                  | 2150                          | 0.497                                 | 0.09                                            |
| 0.051                                  | 3160                          | 0.519                                 | 0.07                                            |
| 0.511                                  | 1950                          | 7.000                                 | 0.08                                            |
| 0.051                                  | 3160                          | 2.756                                 | 0.07                                            |

<sup>a</sup> Data obtained at a GC electrode at a scan rate of  $100 \text{ mV s}^{-1}$ **Table S7.** Dependence of cyclic voltammetric data for oxidation of  $\text{Dipp}_3\text{P}$  on concentration. <sup>a</sup>

| $[\text{Dipp}_3\text{P}] / \text{mM}$ <sup>b</sup> | $\Delta E_p$ | $i_p / \mu\text{A}$ |
|----------------------------------------------------|--------------|---------------------|
| 0.497                                              | 64           | 0.825               |
| 2.02                                               | 71           | 3.72                |
| 4.26                                               | 81           | 9.25                |
| 9.23                                               | 96           | 16.5                |

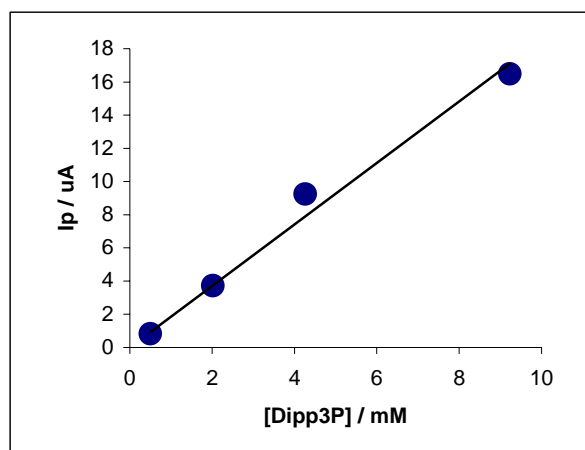<sup>a</sup> Data obtained at a GC electrode at a scan rate of  $95 \text{ mVs}^{-1}$ .<sup>b</sup> In  $\text{CH}_2\text{Cl}_2$  ( $0.5 \text{ M } {}^n\text{Bu}_4\text{NPF}_6$ ).**Figure S1.**  $\text{SS } {}^{31}\text{P}$  NMR spectrum in a MAS probe of  $\text{Dipp}_3\text{P}$  without spinning and with cross polarization and  ${}^1\text{H}$  decoupling. The  $\Delta\nu_{1/2}$  is 4.4 kHz.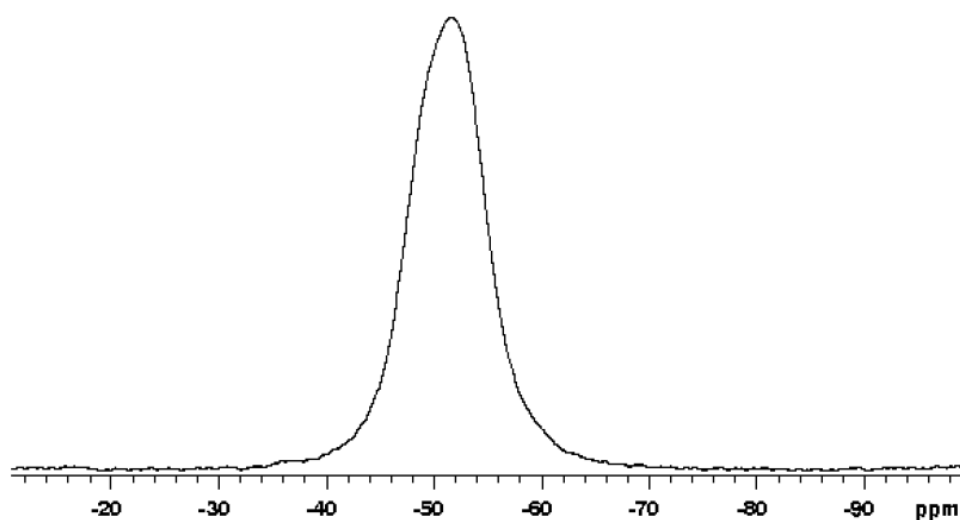

**Figure S2** Solution  $^1\text{H}$  NMR of  $\text{Dipp}_3\text{P}$  in  $\text{CD}_2\text{Cl}_2$  at  $-80^\circ\text{C}$  (bottom) and  $25^\circ\text{C}$  (top)

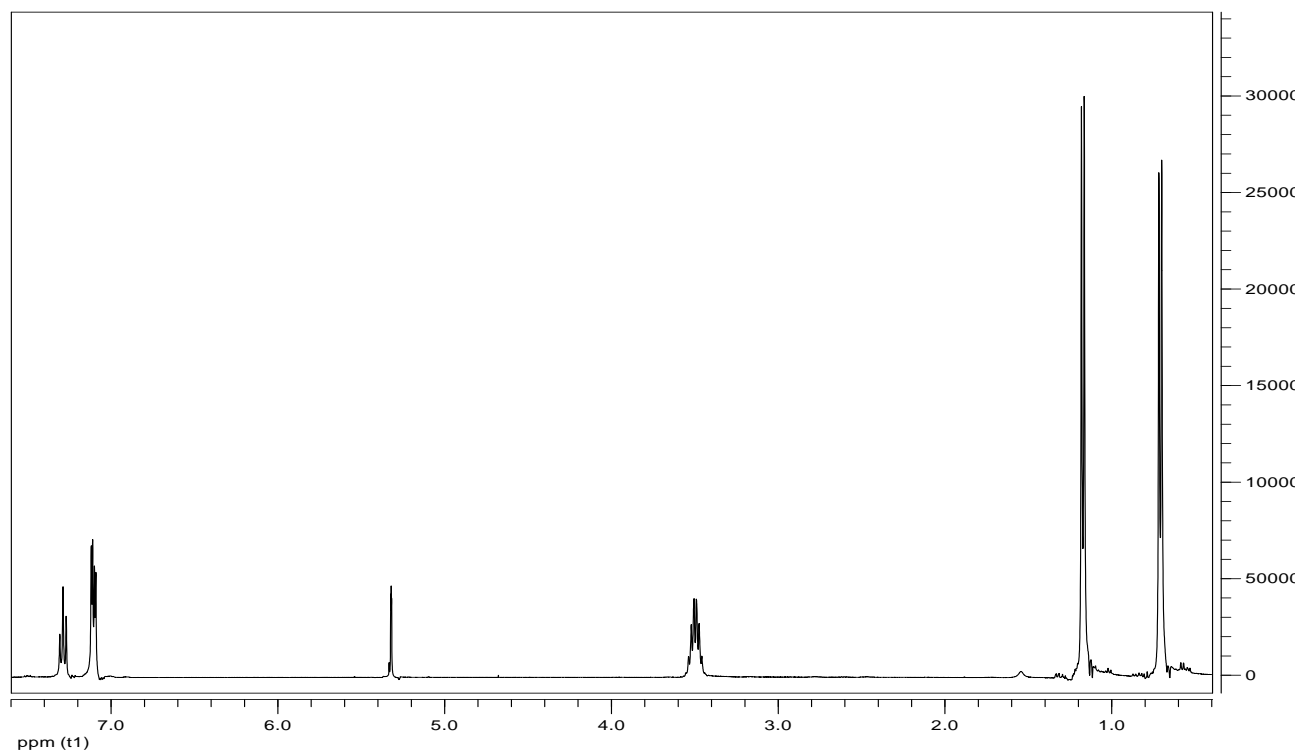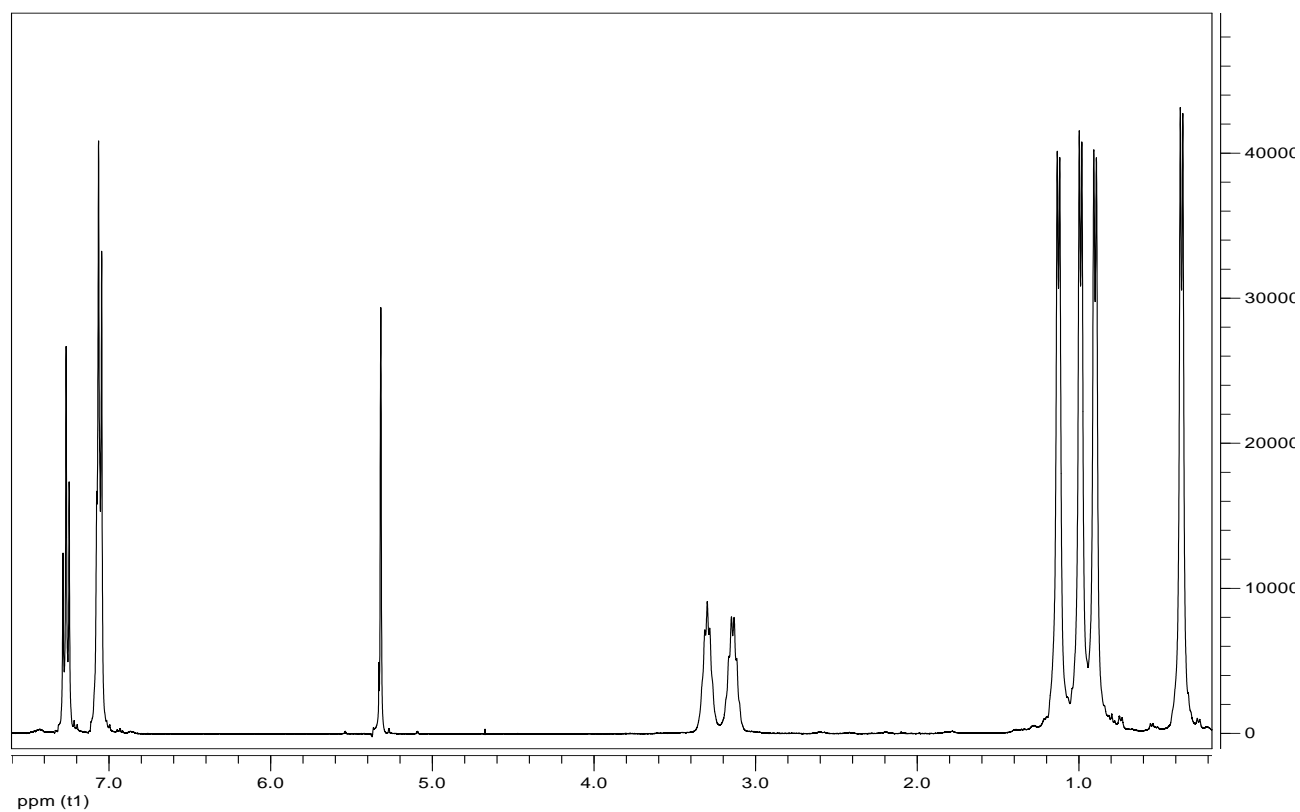



**Figure S3** Eyring Plots for the DNMR measurements of Dipp<sub>3</sub>P from the  $\Delta\nu_{1/2}$  analysis for <sup>13</sup>C and <sup>1</sup>H data, respectively, for the isopropyl methyl groups. Experimental data are from the downfield (solid circles) and upfield (open circles) methyl carbon resonances. Lines are linear regression fits.

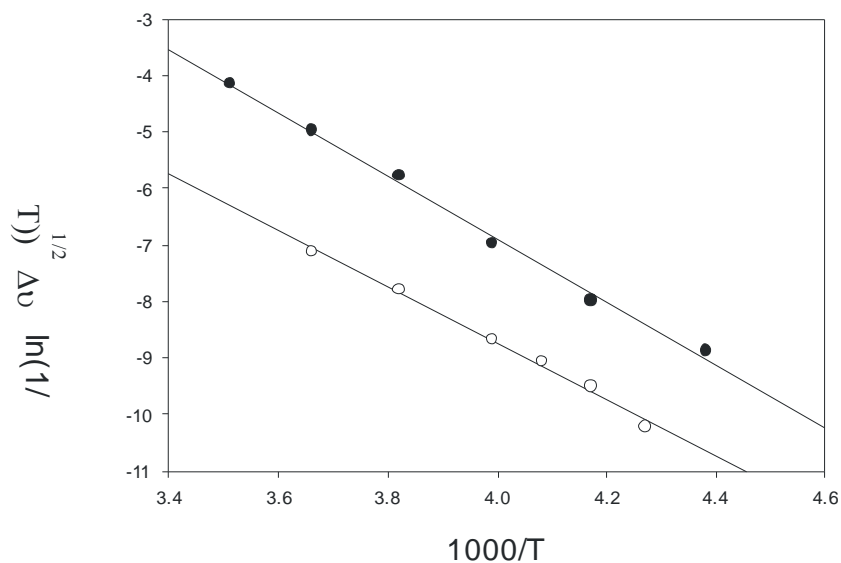

**Figure S4** Eyring Plots for the DNMR measurements of Dipp<sub>3</sub>P from the LSA analysis for <sup>13</sup>C and <sup>1</sup>H data, respectively, for the isopropyl methyl groups. Experimental data are from the downfield (solid circles) and upfield (open circles) methyl carbon resonances. Lines are linear regression fits.

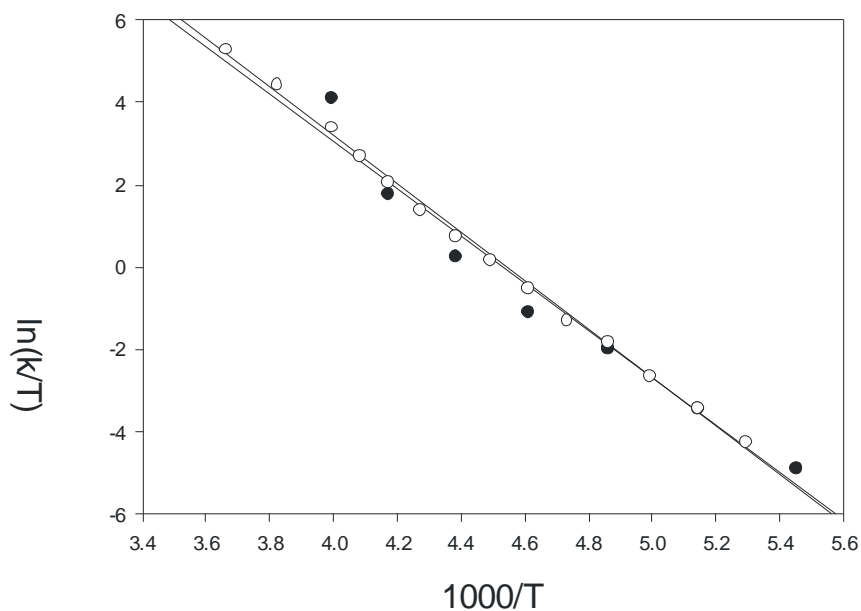

**Figure S5** Summary of the Eyring Plots for the DNMR measurements of Dipp<sub>3</sub>P for <sup>13</sup>C and <sup>1</sup>H data, respectively, for the isopropyl methyl groups. Experimental data are all from the downfield methyl carbon resonances, as follows: (solid circles) LSA in <sup>13</sup>C; (solid triangles) LSA in <sup>1</sup>H; (open circles)  $\Delta v_{1/2}$  analysis in <sup>13</sup>C; (open triangles)  $\Delta v_{1/2}$  analysis in <sup>1</sup>H.

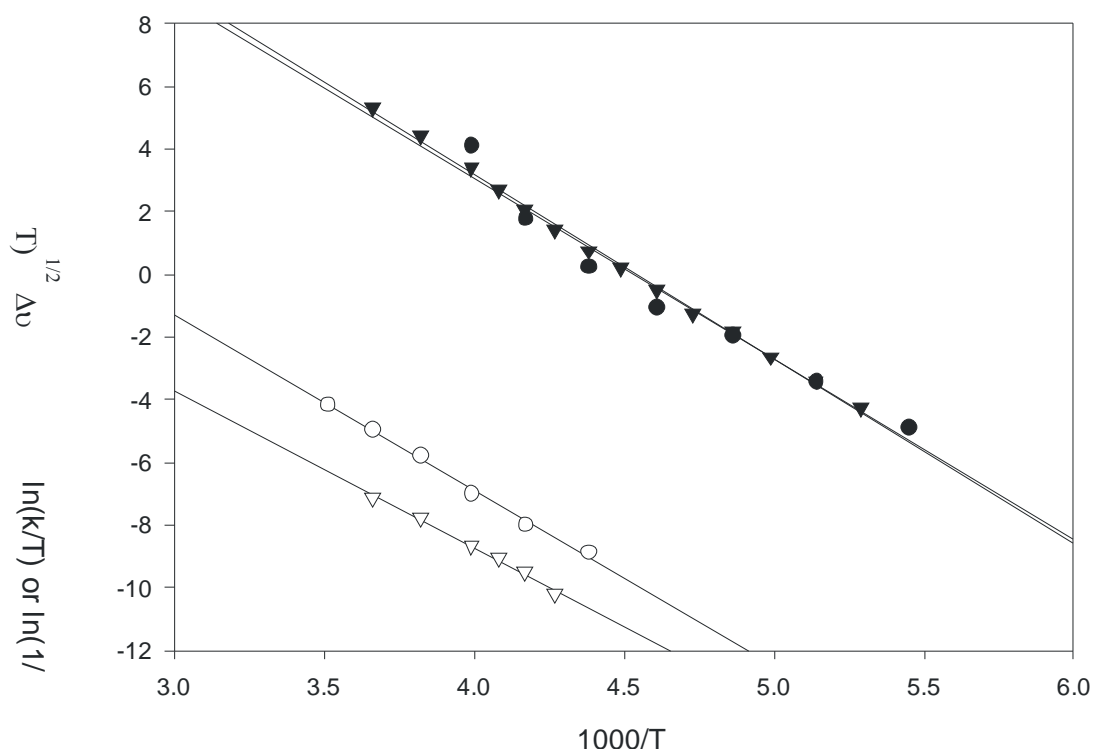

**Figure S6** RDE simulated and experimental voltammograms for Dipp<sub>3</sub>P (8.85 mM) in CH<sub>2</sub>Cl<sub>2</sub> (0.5M <sup>n</sup>Bu<sub>4</sub>NPF<sub>6</sub>) at a GC electrode. (a) RDE of Dipp<sub>3</sub>P before bulk electrolysis and best fit simulation  $E_f^\circ = 0.08$  V;  $\alpha = 0.5$ ;  $k_s = 0.01$  cm<sup>2</sup> s<sup>-1</sup>;  $D_R = D_O = 1.06 \times 10^{-5}$  cm<sup>2</sup> s<sup>-1</sup>; [Dipp<sub>3</sub>P] = 8.85 mM; kinetic viscosity of CH<sub>2</sub>Cl<sub>2</sub> = 0.0033 cm<sup>2</sup> s<sup>-1</sup>; electrode radius = 0.15 cm;  $R_u = 1000$  ohm). (b) [Dipp<sub>3</sub>P]<sup>+</sup> generated in bulk electrolysis, experimental and best fit parameters:  $R_u = 700$  ohm (all other parameters as in a).  $R_u$  has decreased from 1000 ohm to 700 ohm because Dipp<sub>3</sub>P<sup>+</sup> provides additional electrolyte. Potentials vs. Fc<sup>+0</sup>.

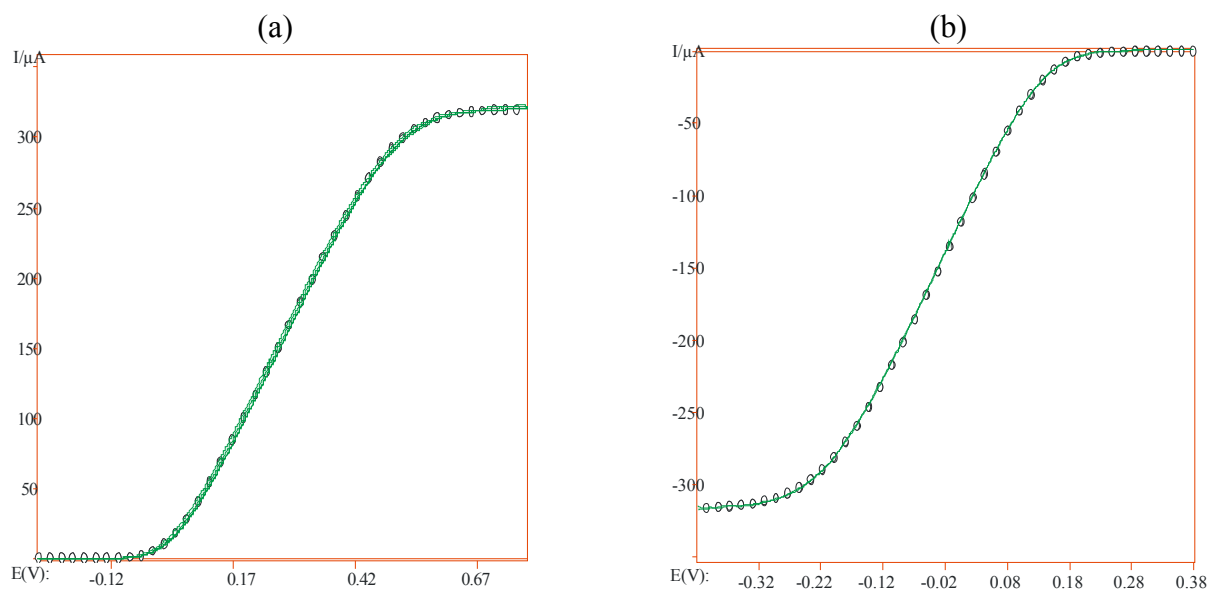

**Figure S7** Kohn-Sham total spin density surface plot of  $[\text{Dipp}_3\text{P}]^{+\bullet}$  from a UB3LYP/6-31G(d) calculation. The view is down the 3-fold axis with the P atom in the centre, where most of the spin density is concentrated.

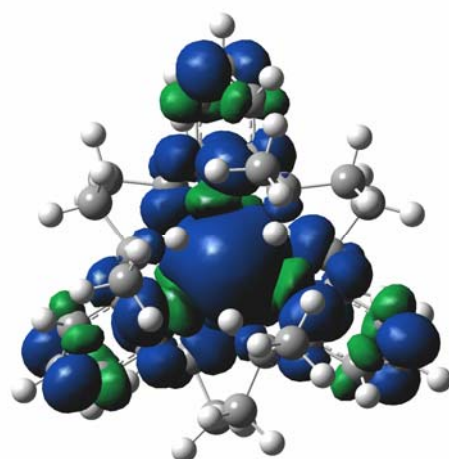

**Figure S8** Walsh diagram connecting pyramidal (left) and planar (right)  $\text{EH}_3$  frontier orbitals

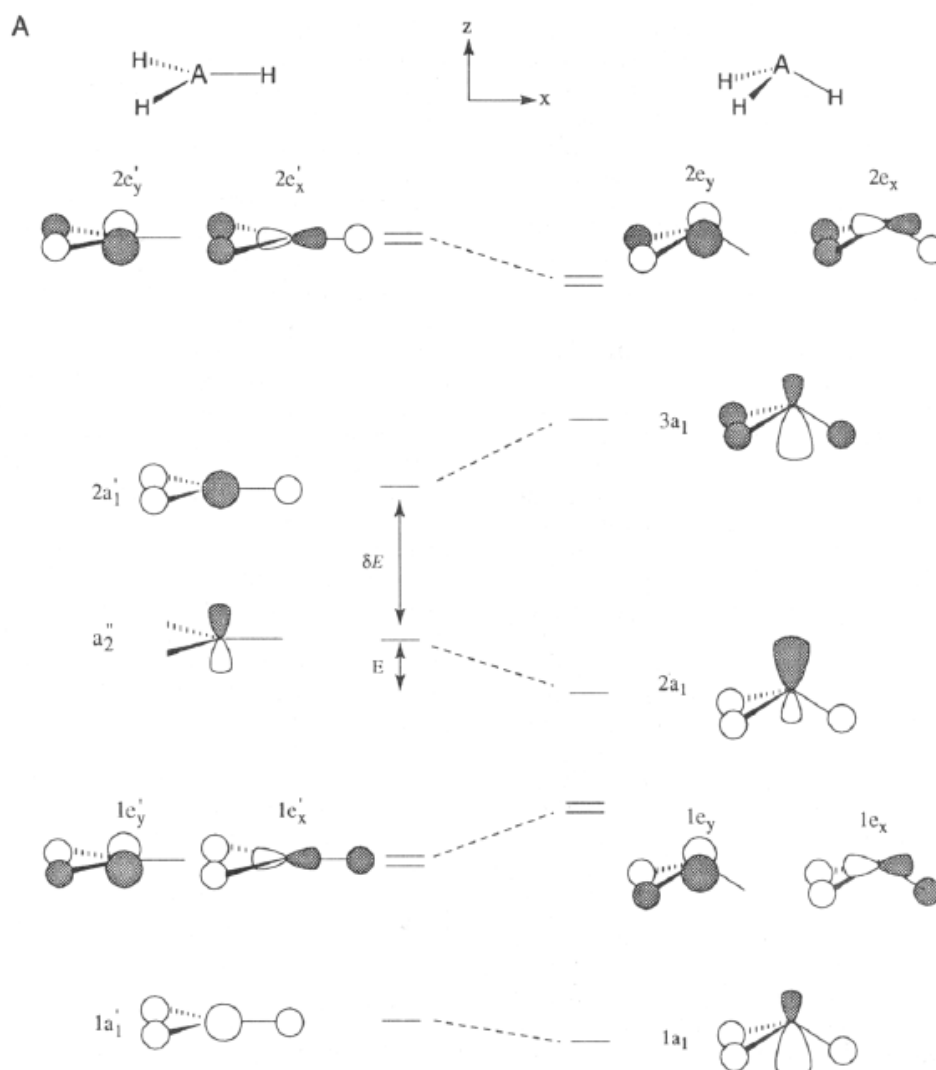

Reproduced from: Gilheany, D. G. *Chem. Rev.* **1994**, *94*, 1339-1374.
